# Supplementary material for: Novel access to carbonyl and acetylated compounds: the role of the tetra-n-butylammonium bromide/sodium nitrite catalyst
Source: Royal Society of Chemistry journal article supplement (doi:10.1039/c6ra08672a), 2016-01-01
Supplement: c6ra08672a1.pdf [file c6ra08672a1.pdf]

## Supporting information for

### A Novel Access to Carbonyl and Acetylated Compounds: the Role of *tetra-n*-Butylammonium Bromide/Sodium Nitrite Catalyst<sup>†</sup>

Mehdi Sheykhan,<sup>\*†</sup>Hadi Fallah Moafi,<sup>†</sup>Masoumeh Abbasnia<sup>‡</sup>

<sup>†</sup>Chemistry Department, University of Guilan, P.O. Box 41335-1914, Rasht, Iran, Fax:

+981333367262, Email: [sheykhan@guilan.ac.ir](mailto:sheykhan@guilan.ac.ir)

<sup>‡</sup>School of Chemistry, College of Science, University of Tehran, P.O. Box 14155-6455, Tehran,  
Iran.

#### Contents

|                                                                                  | Page    |
|----------------------------------------------------------------------------------|---------|
| 1. General Remarks                                                               | S2      |
| 2. General experimental procedure                                                | S2      |
| 3. Copies of some of <sup>1</sup> H NMR Spectra of the aerobic oxidized products | S3-S15  |
| 4. Copies of some of <sup>1</sup> H NMR Spectra of the acetylated products       | S16-S26 |

## **1 General Remarks**

All commercially available reagents were used without further purification. TLC was conducted on silica gel 250 micron, F254 plates. Flash chromatography was carried out on silica gel.  $^1\text{H}$  NMR spectra were recorded at room temperature on 500 MHz spectrometers, using  $\text{CDCl}_3$  as the NMR solvent. Chemical shifts are reported in ppm with TMS as an internal standard (TMS:  $\delta$  0.0 ppm).

### **General Procedure for the aerobic oxidation of benzylic alcohols and acetylation of primary aliphatic alcohols**

A mixture of alcohol (1 mmol), sodium nitrite (0.05 mmol, 5 mol%), tetra-*n*-butylammonium bromide (TBAB, 0.05 mmol, 5 mol%), and acetic acid (0.5 mL) was prepared in a two-necked flask and then the flask filled with air by use of a balloon. The reaction mixture stirred at 70 °C and the progress of the reaction was monitored by means of TLC. After completion of the reaction followed by addition of dichloromethane (5 mL) to the reaction flask, the mixture was centrifuged and the solute was separated and dried with sodium sulfate. After evaporation of dichloromethane and chromatographic purification, the structures of carbonyl/acetylated products were proved by the comparison of their  $^1\text{H}$ NMR by related literatures.

## **3 Copies of some of $^1\text{H}$ NMR Spectra of the aerobic oxidized products**

SpinWorks 4: p-NO<sub>2</sub> 1HNMR in CDCl<sub>3</sub> at 298K 1395/2/15

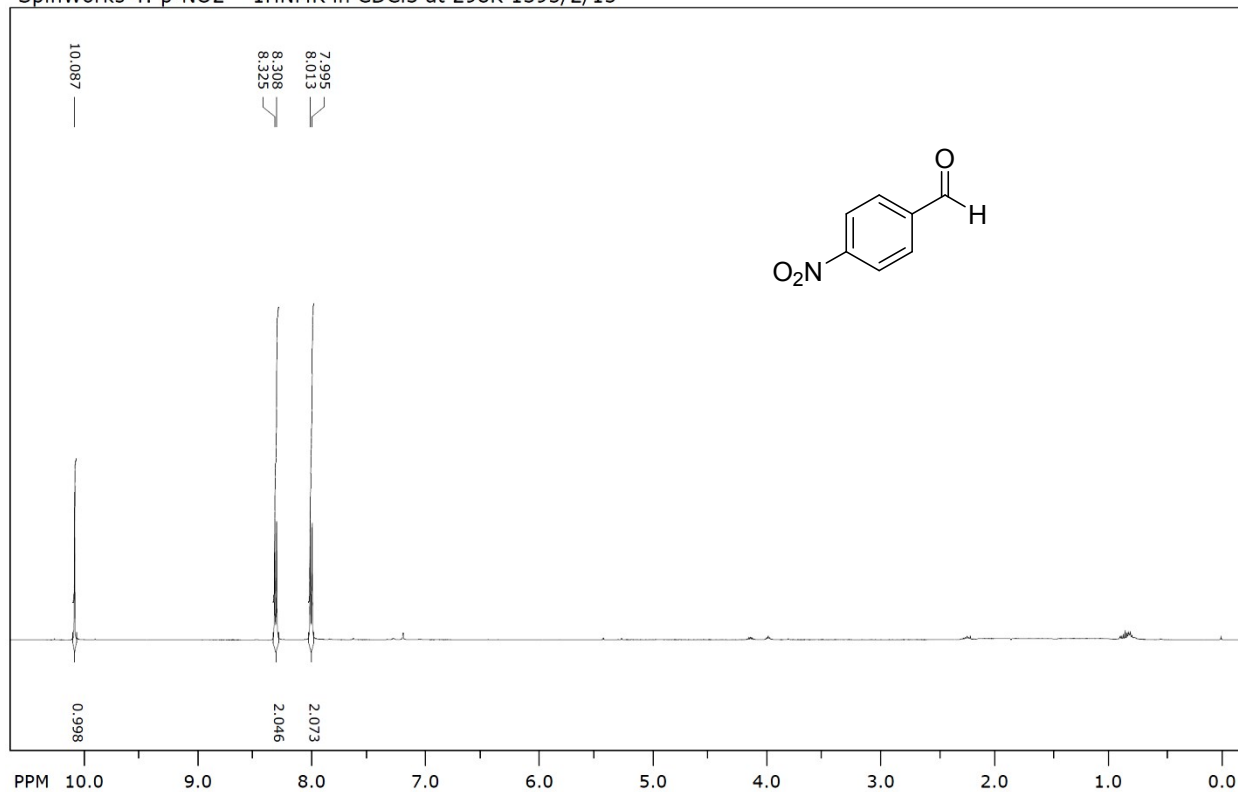

file: ....\catalysis\ aerobic\Sheykhan\4\fid exp: <zg30>  
transmitter freq.: 500.133089 MHz  
time domain size: 32768 points  
width: 10000.00 Hz = 19.9947 ppm = 0.305176 Hz/pt

freq. of 0 ppm: 500.130055 MHz  
processed size: 32768 complex points  
LB: 0.300 GF: 0.0000  
Hz/cm: 216.884 ppm/cm: 0.43365

SpinWorks 4: p-NO2 1HNMR in CDCl3 at 298K 1395/2/15

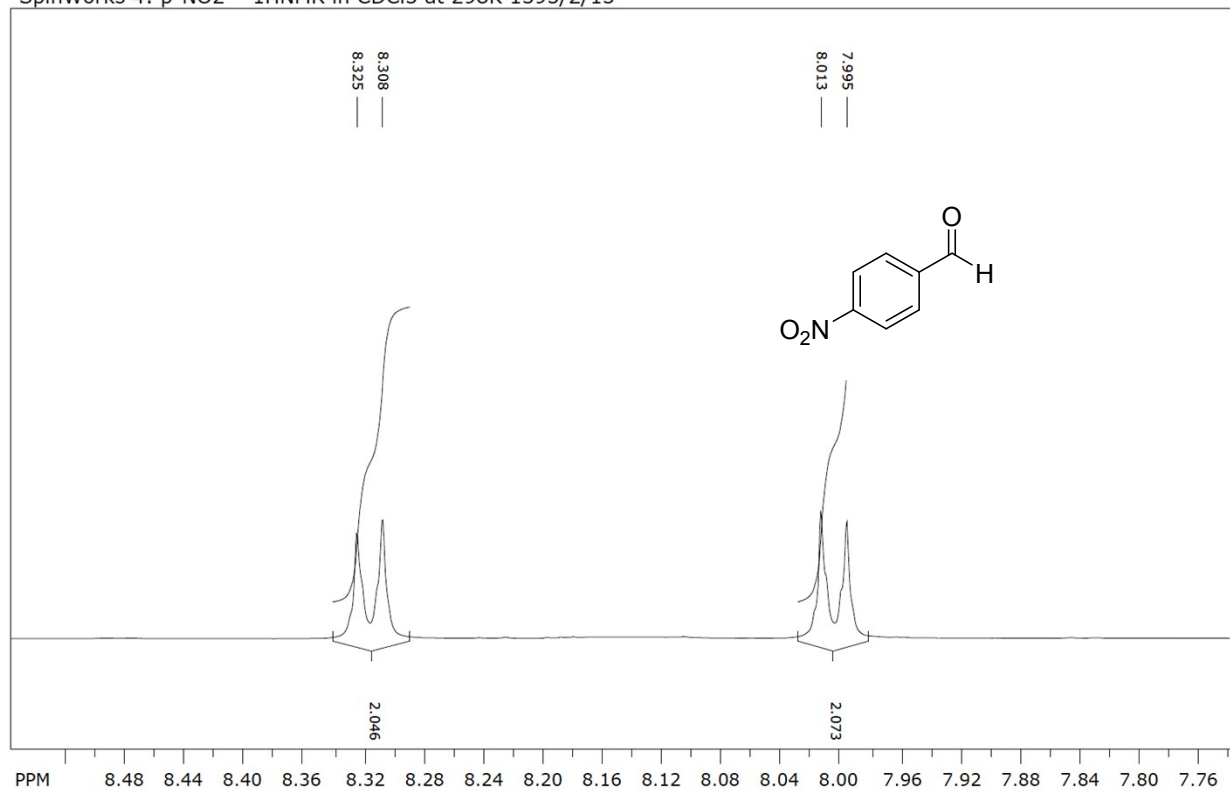

file: ....\catalysis\ aerobic\Sheykhan\4\fid expt: <zg30>  
transmitter freq.: 500.133089 MHz  
time domain size: 32768 points  
width: 10000.00 Hz = 19.9947 ppm = 0.305176 Hz/pt

freq. of 0 ppm: 500.130055 MHz  
processed size: 32768 complex points  
LB: 0.300 GF: 0.0000  
Hz/cm: 16.518 ppm/cm: 0.03303

SpinWorks 4: P-Chloro 1H NMR in CDCl3 at 298K 95/2/15

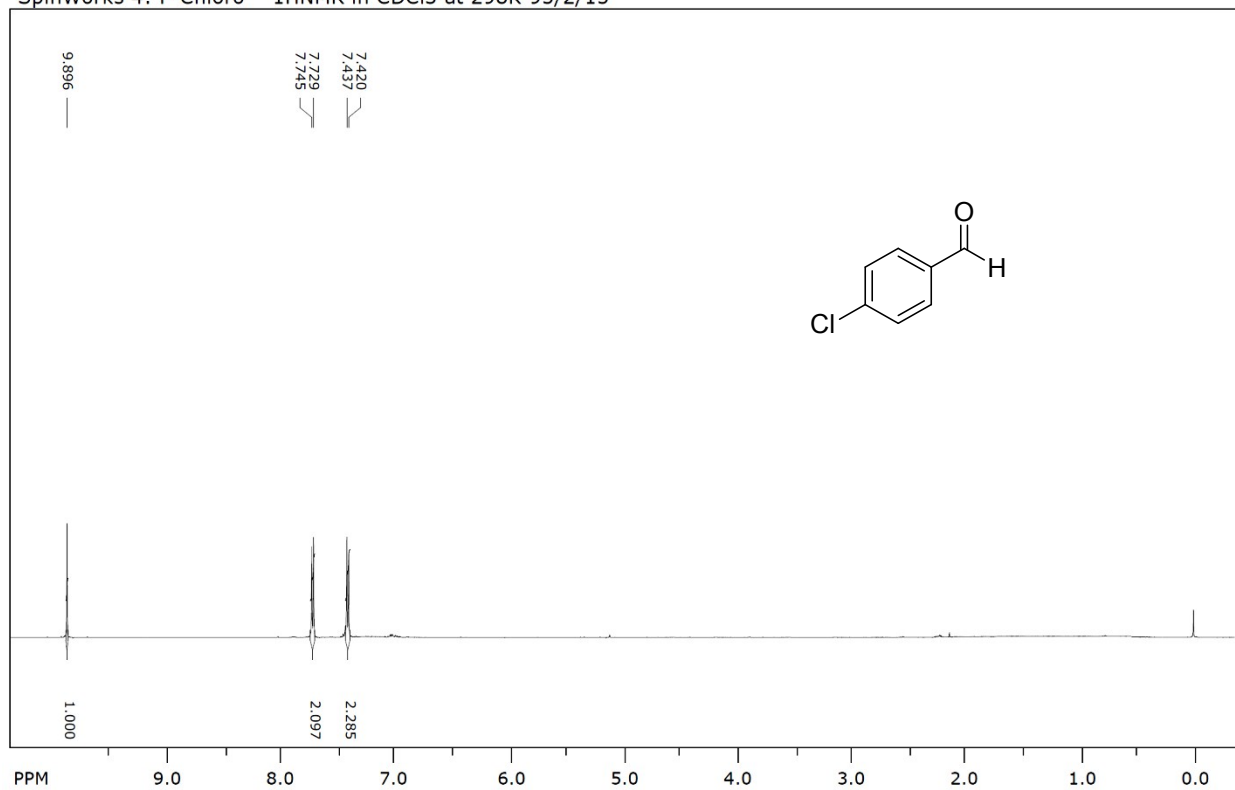

file: ...:\catalysis\ aerobic\Sheykhan\8\fid expt: <zg30>  
transmitter freq.: 500.133089 MHz  
time domain size: 32768 points  
width: 10000.00 Hz = 19.9947 ppm = 0.305176 Hz/pt  
number of scans: 8

freq. of 0 ppm: 500.130063 MHz  
processed size: 32768 complex points  
LB: 0.300 GF: 0.0000  
Hz/cm: 215.409 ppm/cm: 0.43070

SpinWorks 4: P-Chloro 1HNMR in CDCl3 at 298K 95/2/15

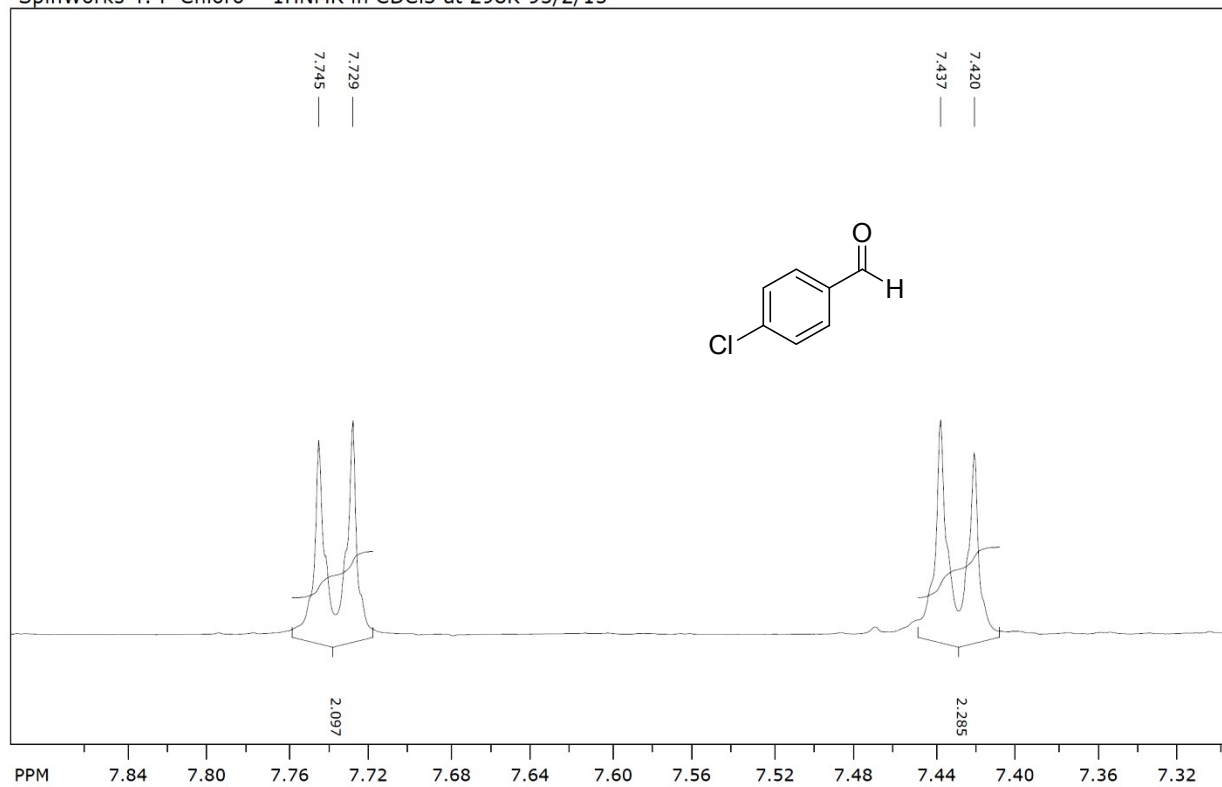

file: ....\catalysis\ aerobic\Sheykhan\8\fid expt: <zg30>  
transmitter freq.: 500.133089 MHz  
time domain size: 32768 points  
width: 10000.00 Hz = 19.9947 ppm = 0.305176 Hz/pt  
number of scans: 8

freq. of 0 ppm: 500.130063 MHz  
processed size: 32768 complex points  
LB: 0.300 GF: 0.0000  
Hz/cm: 12.114 ppm/cm: 0.02422

SpinWorks 4: 2-nitro 1HNMR in CDCl3 at 298K 1394/3/13

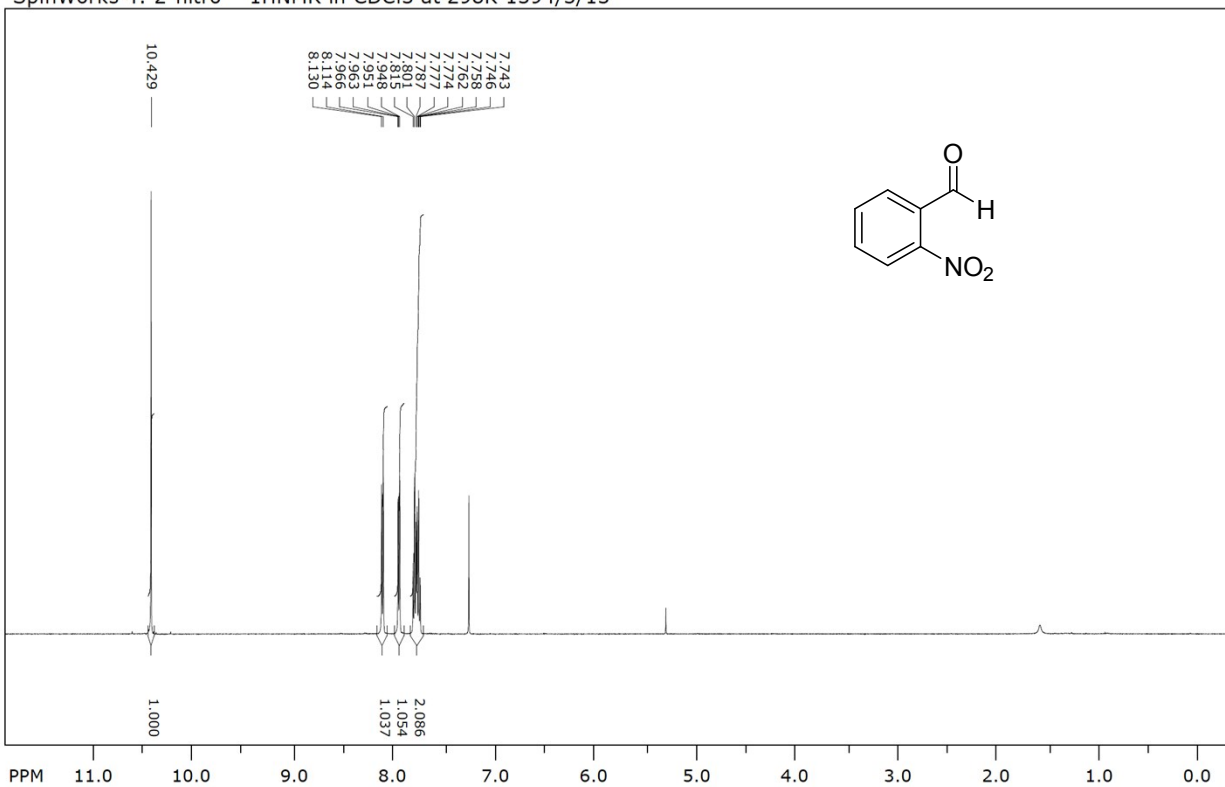

file: ....\catalysis\ aerobic\Sheykan\2\fid exp: <zg30>  
 transmitter freq.: 500.133089 MHz  
 time domain size: 32768 points  
 width: 10000.00 Hz = 19.9947 ppm = 0.305176 Hz/pt  
 number of scans: 8

freq. of 0 ppm: 500.130023 MHz  
 processed size: 32768 complex points  
 LB: 0.300 GF: 0.0000  
 Hz/cm: 243.750 ppm/cm: 0.48737

SpinWorks 4: 2-nitro 1HNMR in CDCl3 at 298K 1394/3/13

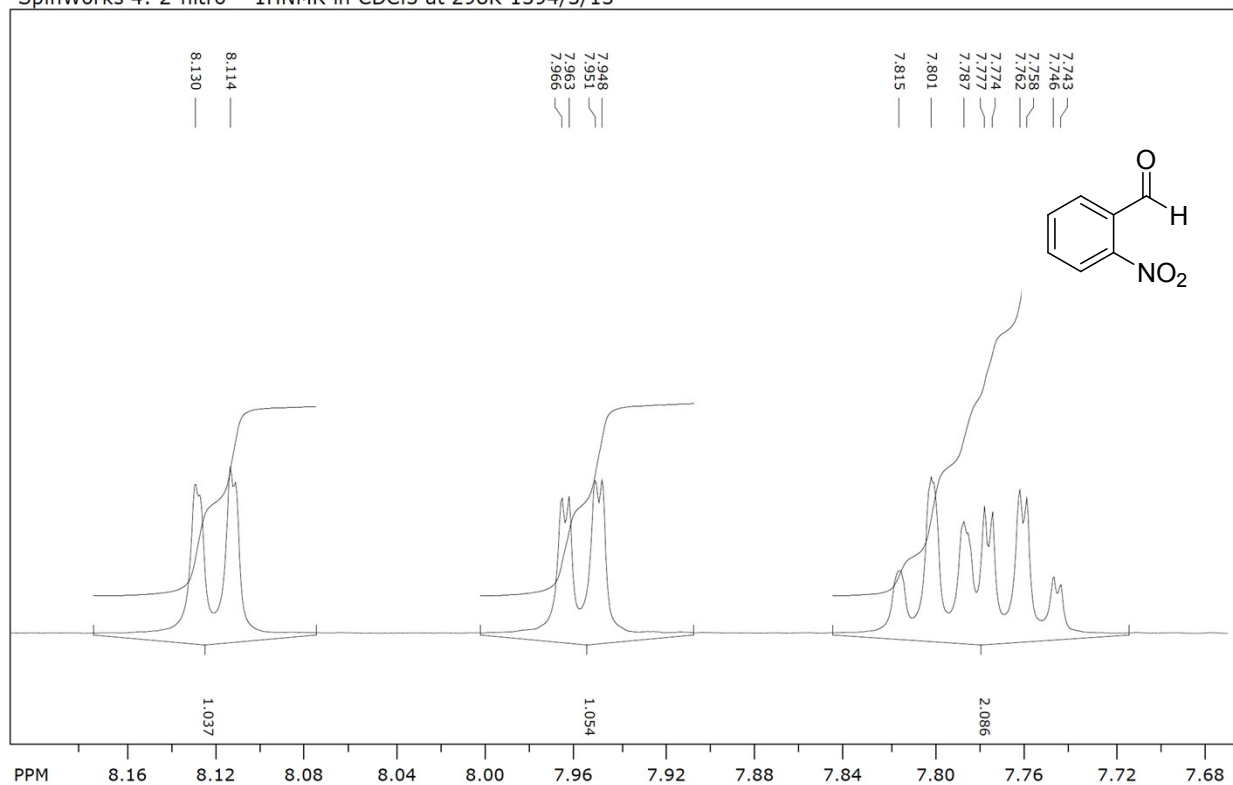

file: ...:\catalysis\ aerobic\Sheykhan\2\fid expt: <zg30>  
 transmitter freq.: 500.133089 MHz  
 time domain size: 32768 points  
 width: 10000.00 Hz = 19.9947 ppm = 0.305176 Hz/pt  
 number of scans: 8

freq. of 0 ppm: 500.130023 MHz  
 processed size: 32768 complex points  
 LB: 0.300 GF: 0.0000  
 Hz/cm: 10.895 ppm/cm: 0.02178

SpinWorks 4: 2,4-Dichloro 1HNMR in CDCl3 at 298K 1395/2/15

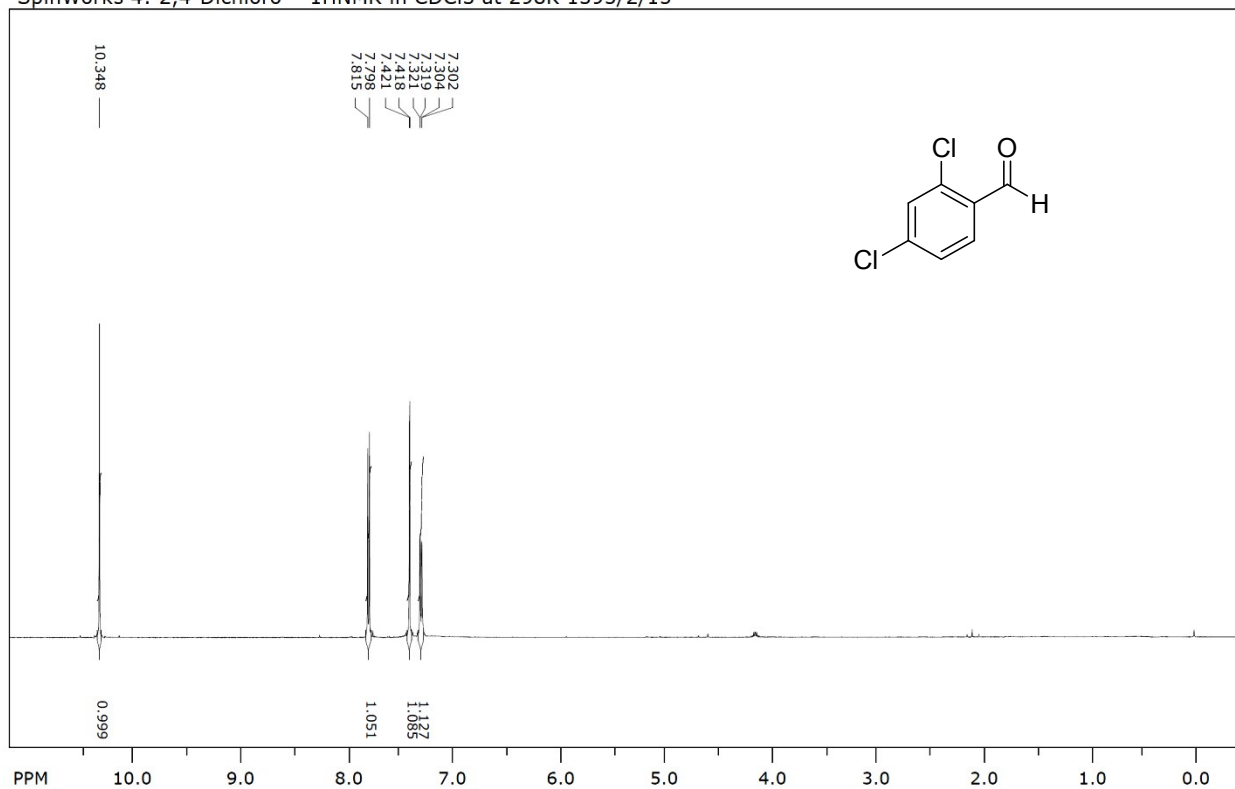

file: ....\catalysis\ aerobic\Sheykhan\3\fid expt: <zg30>  
transmitter freq.: 500.133089 MHz  
time domain size: 32768 points  
width: 10000.00 Hz = 19.9947 ppm = 0.305176 Hz/pt  
number of scans: 16

freq. of 0 ppm: 500.130055 MHz  
processed size: 32768 complex points  
LB: 0.300 GF: 0.0000  
Hz/cm: 231.782 ppm/cm: 0.46344

SpinWorks 4: 2,4-Dichloro 1HNMR in CDCl3 at 298K 1395/2/15

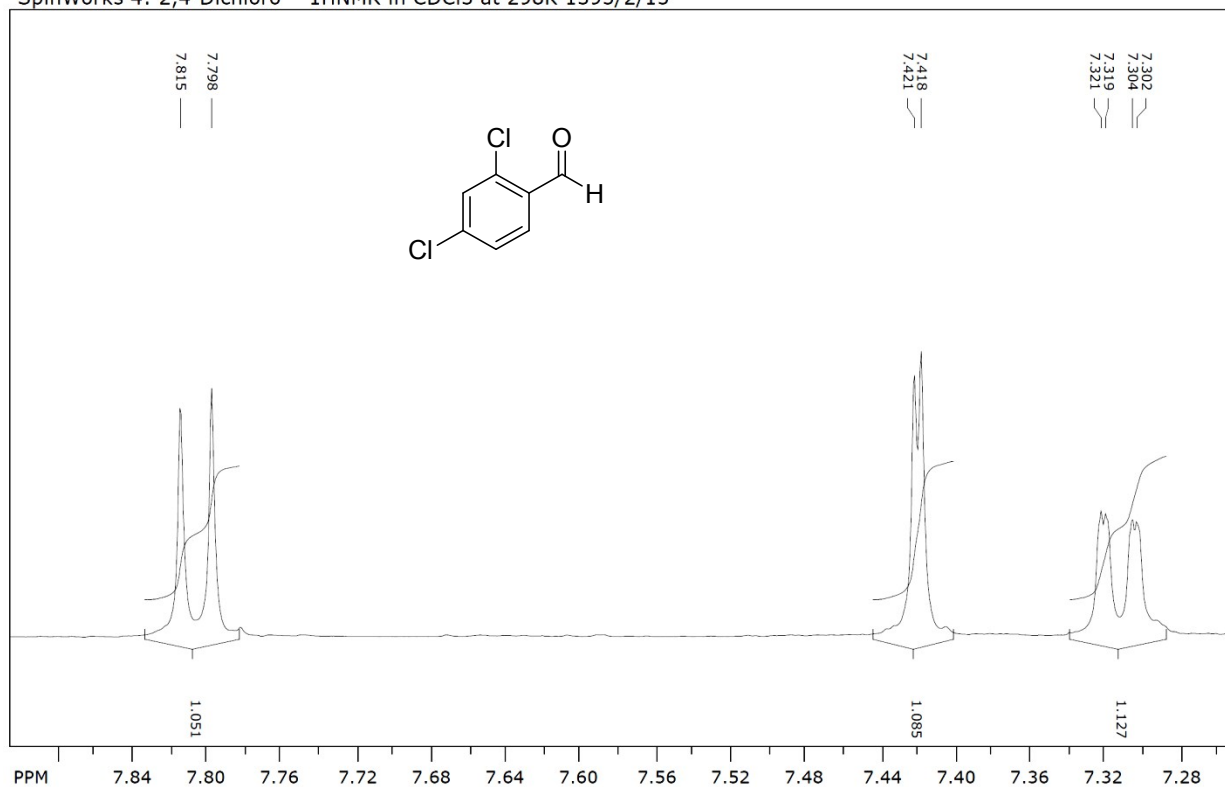

file: ....\catalysis\ aerobic\Sheykhan\3\fid expt: <zg30>  
 transmitter freq.: 500.133089 MHz  
 time domain size: 32768 points  
 width: 10000.00 Hz = 19.9947 ppm = 0.305176 Hz/pt  
 number of scans: 16

freq. of 0 ppm: 500.130055 MHz  
 processed size: 32768 complex points  
 LB: 0.300 GF: 0.0000  
 Hz/cm: 13.109 ppm/cm: 0.02621

SpinWorks 4: 4-Me 1HNMR in CDCl3 at 298K 94/3/25

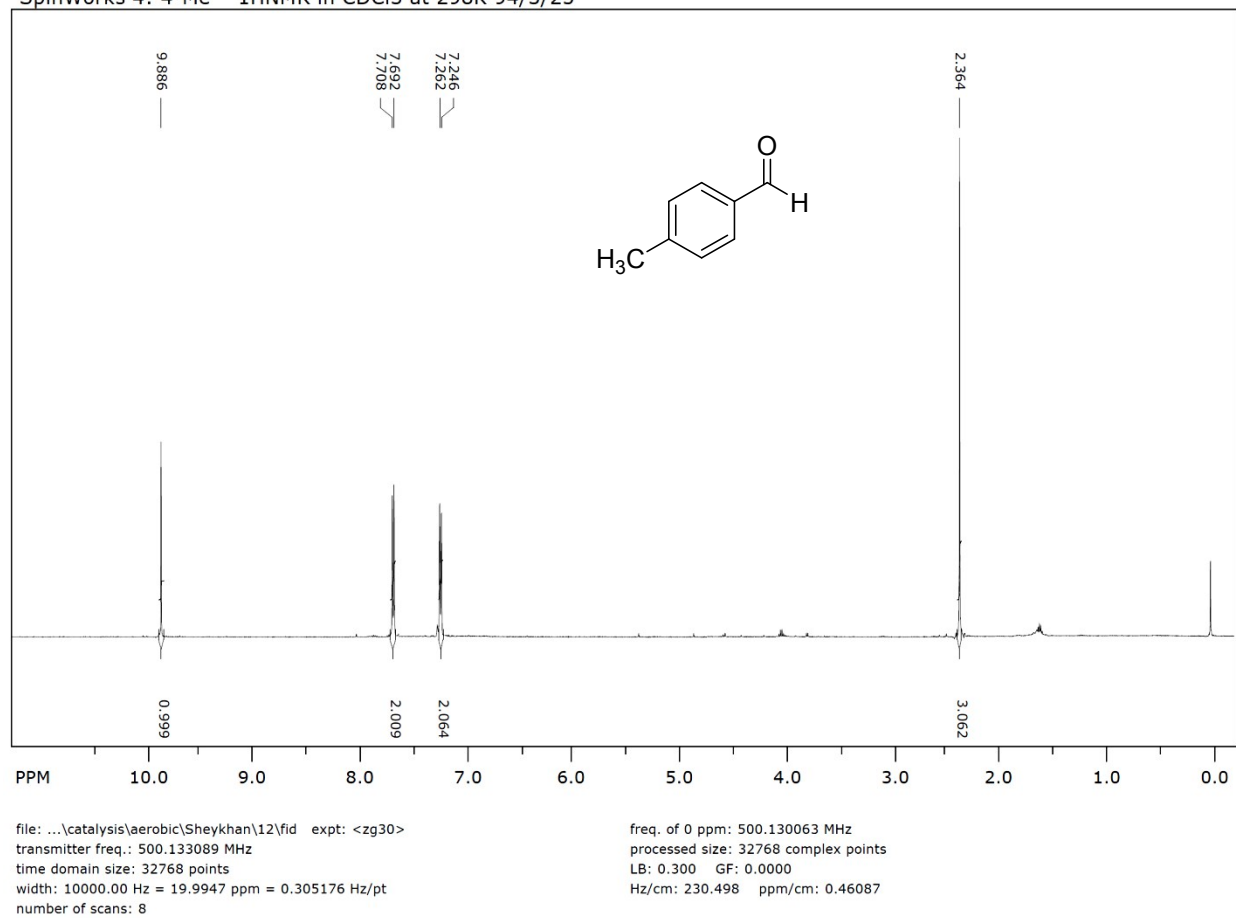

SpinWorks 4: 4-Me 1HNMR in CDCl3 at 298K 94/3/25

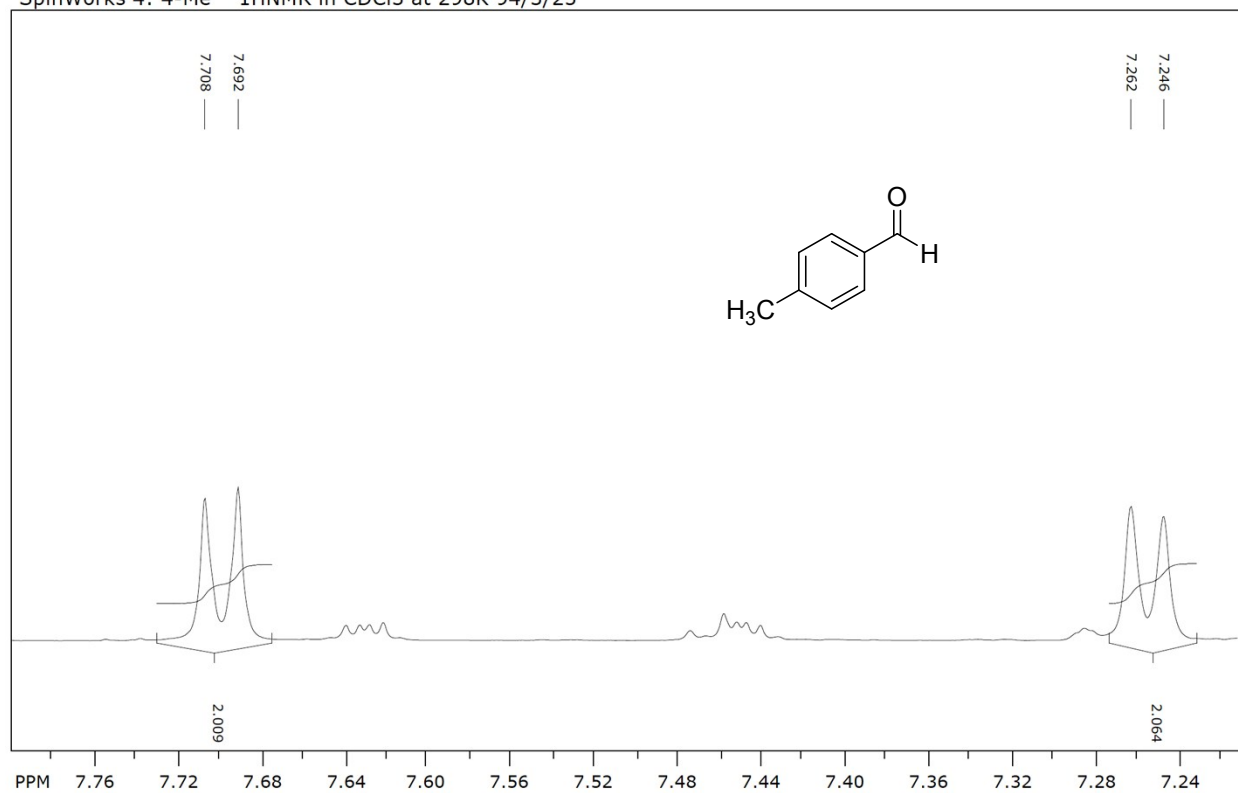

file: ...catalysis\ aerobic\Sheykhan\12\fid expt: <zg30>  
transmitter freq.: 500.133089 MHz  
time domain size: 32768 points  
width: 10000.00 Hz = 19.9947 ppm = 0.305176 Hz/pt  
number of scans: 8

freq. of 0 ppm: 500.130063 MHz  
processed size: 32768 complex points  
LB: 0.300 GF: 0.0000  
Hz/cm: 11.839 ppm/cm: 0.02367

SpinWorks 4: 4-Me <sup>1</sup>HNMR in CDCl<sub>3</sub> at 298K 94/3/25

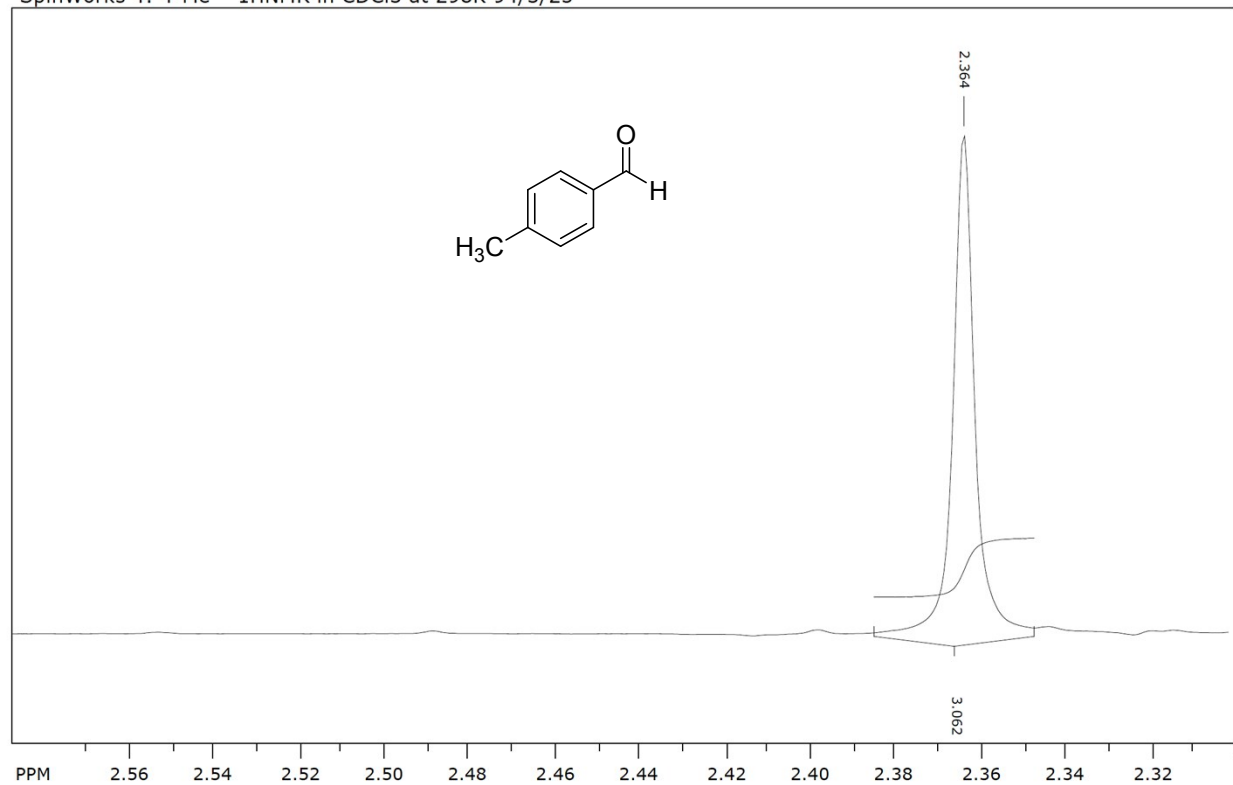

file: ...\\catalysis\\aerobic\\Sheykhan\\12\\fid expt: <zg30>  
transmitter freq.: 500.133089 MHz  
time domain size: 32768 points  
width: 10000.00 Hz = 19.9947 ppm = 0.305176 Hz/pt  
number of scans: 8

freq. of 0 ppm: 500.130063 MHz  
processed size: 32768 complex points  
LB: 0.300 GF: 0.0000  
Hz/cm: 5.752 ppm/cm: 0.01150

SpinWorks 4: CF3 1HNMR in CDCl3 at 298K 94/3/25

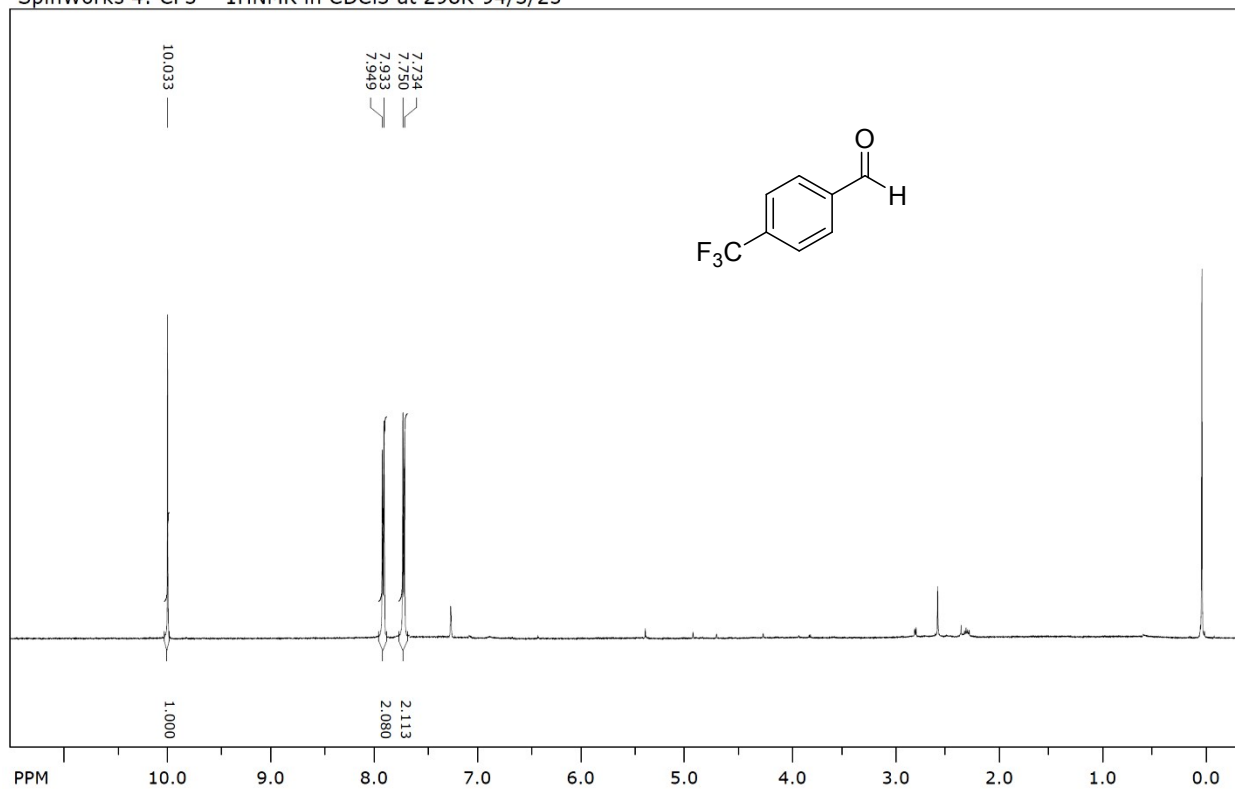

file: ...catalysis\ aerobic\Sheykhan\13\fid exp: <zg30>  
transmitter freq.: 500.133089 MHz  
time domain size: 32768 points  
width: 10000.00 Hz = 19.9947 ppm = 0.305176 Hz/pt  
number of scans: 16

freq. of 0 ppm: 500.130058 MHz  
processed size: 32768 complex points  
LB: 0.300 GF: 0.0000  
Hz/cm: 237.881 ppm/cm: 0.47564

SpinWorks 4: CF3 1HNMR in CDCl3 at 298K 94/3/25

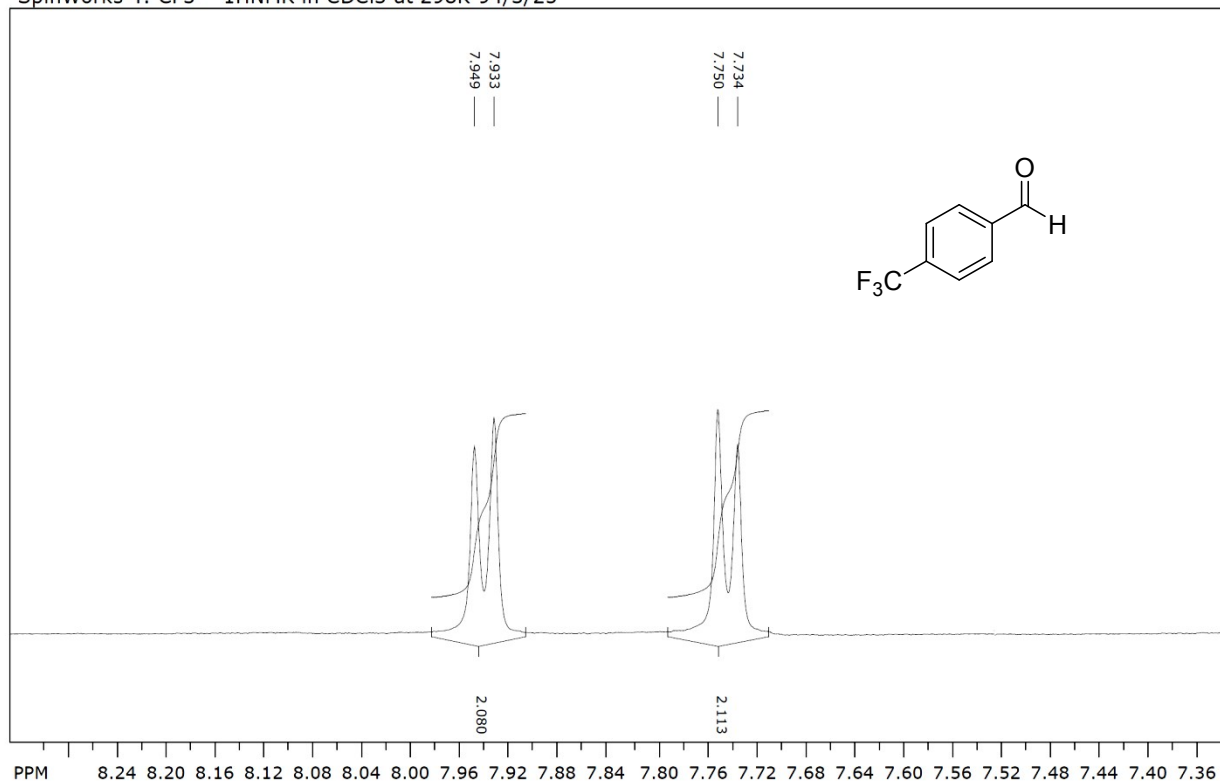

file: ...\\catalysis\\aerobic\\Sheykhan\\13\\fid expt: <zg30>  
transmitter freq.: 500.133089 MHz  
time domain size: 32768 points  
width: 10000.00 Hz = 19.9947 ppm = 0.305176 Hz/pt  
number of scans: 16

freq. of 0 ppm: 500.130058 MHz  
processed size: 32768 complex points  
LB: 0.300 GF: 0.0000  
Hz/cm: 19.855 ppm/cm: 0.03970

#### 4 <sup>1</sup>H NMR of some of the acetylated products

SpinWorks 4: 5-OH-Me-2-Fur 1HNMR in CDCl3 at 298K 94/3/25

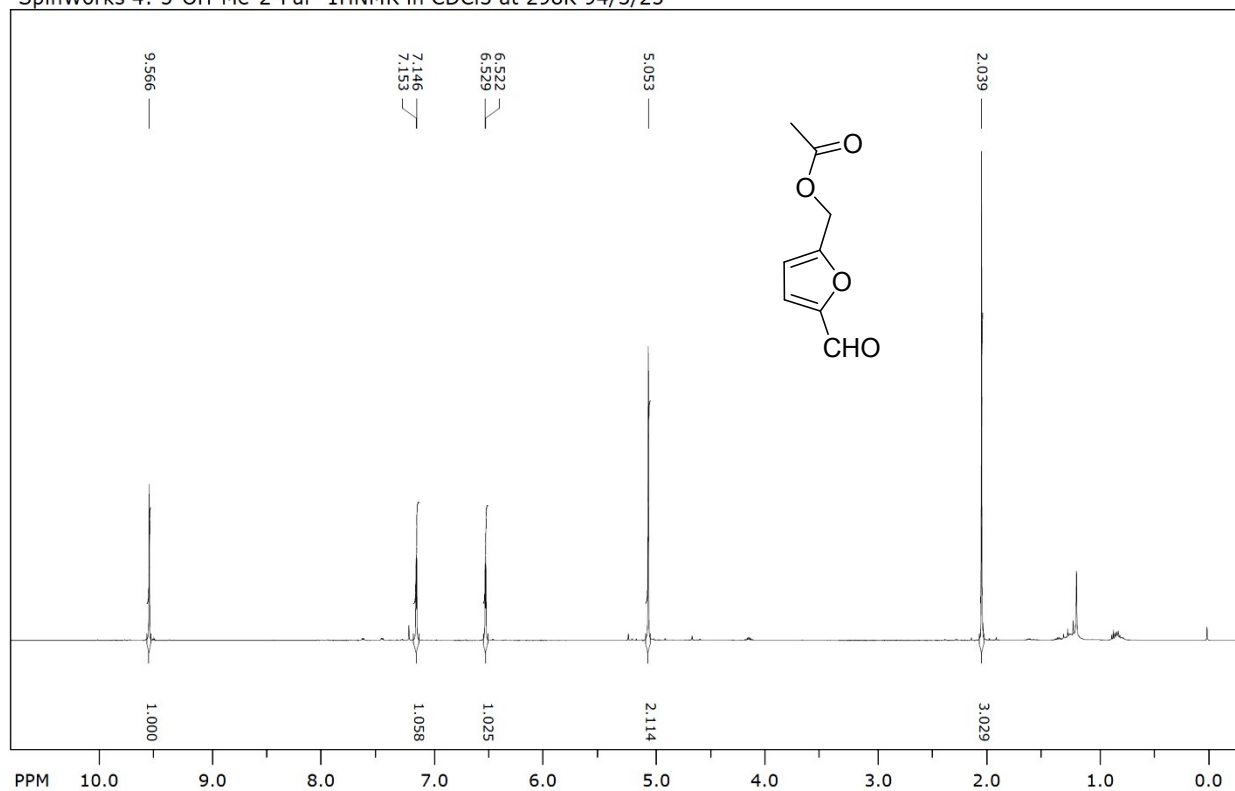

file: ...catalysis\ aerobic\Sheykhan\10\fid expt: <zg30>  
 transmitter freq.: 500.133089 MHz  
 time domain size: 32768 points  
 width: 10000.00 Hz = 19.9947 ppm = 0.305176 Hz/pt  
 number of scans: 16

freq. of 0 ppm: 500.130044 MHz  
 processed size: 32768 complex points  
 LB: 0.300 GF: 0.0000  
 Hz/cm: 222.151 ppm/cm: 0.44418

SpinWorks 4: 5-OH-Me-2-Fur 1HNMR in CDCl3 at 298K 94/3/25

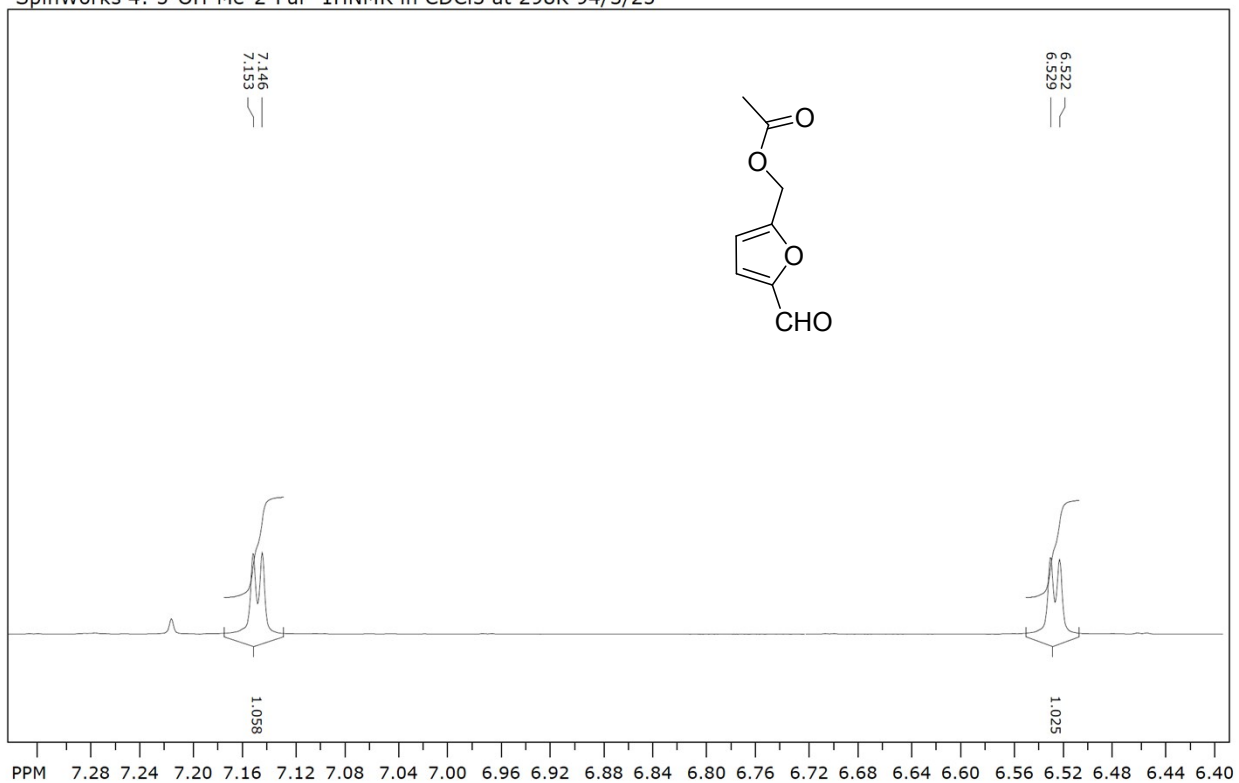

file: ...\\catalysis\\aerobic\\Sheykhan\\10\\fid exp: <zg30>  
transmitter freq.: 500.133089 MHz  
time domain size: 32768 points  
width: 10000.00 Hz = 19.9947 ppm = 0.305176 Hz/pt  
number of scans: 16

freq. of 0 ppm: 500.130044 MHz  
processed size: 32768 complex points  
LB: 0.300 GF: 0.0000  
Hz/cm: 19.077 ppm/cm: 0.03814

SpinWorks 4: 5-OH-Me-2-Fur 1HNMR in CDCl3 at 298K 94/3/25

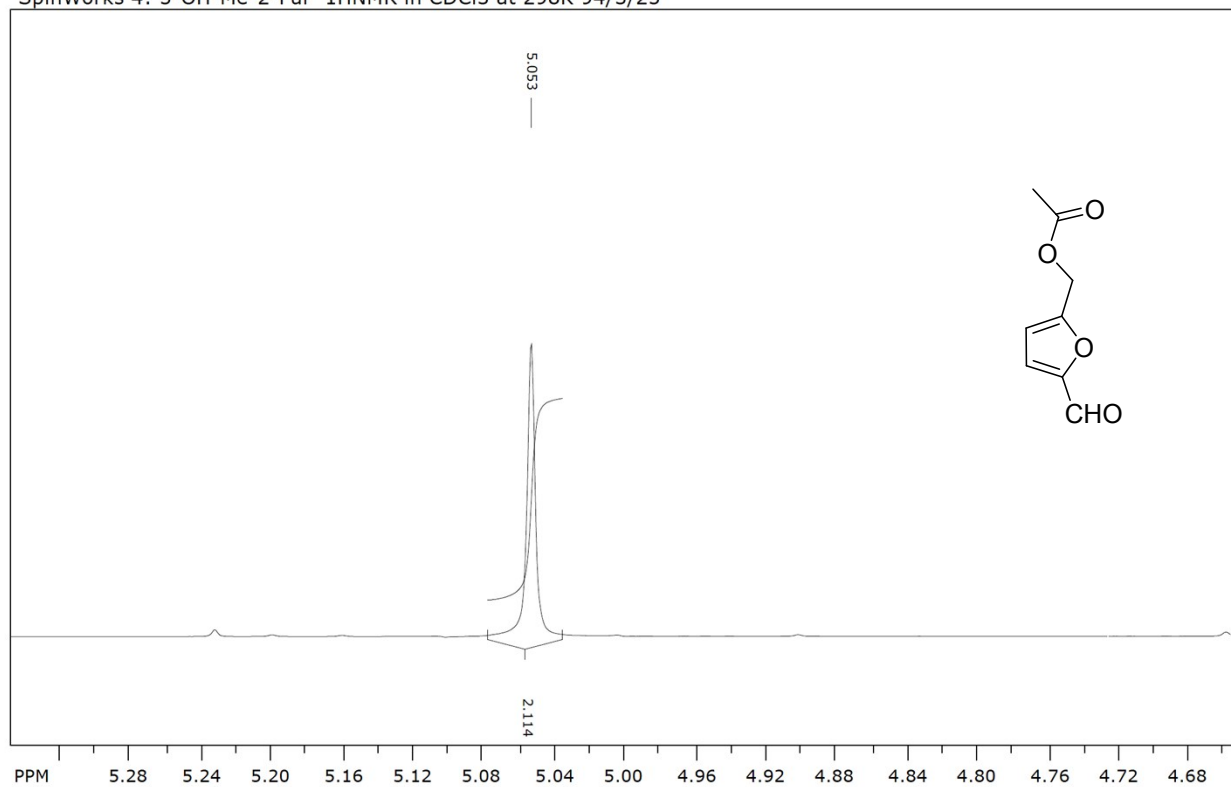

file: ...\\catalysis\\aerobic\\Sheykhan\\10\\fid expt: <zg30>  
transmitter freq.: 500.133089 MHz  
time domain size: 32768 points  
width: 10000.00 Hz = 19.9947 ppm = 0.305176 Hz/pt  
number of scans: 16

freq. of 0 ppm: 500.130044 MHz  
processed size: 32768 complex points  
LB: 0.300 GF: 0.0000  
Hz/cm: 13.907 ppm/cm: 0.02781

SpinWorks 4: 5-OH-Me-2-Fur 1HNMR in CDCl3 at 298K 94/3/25

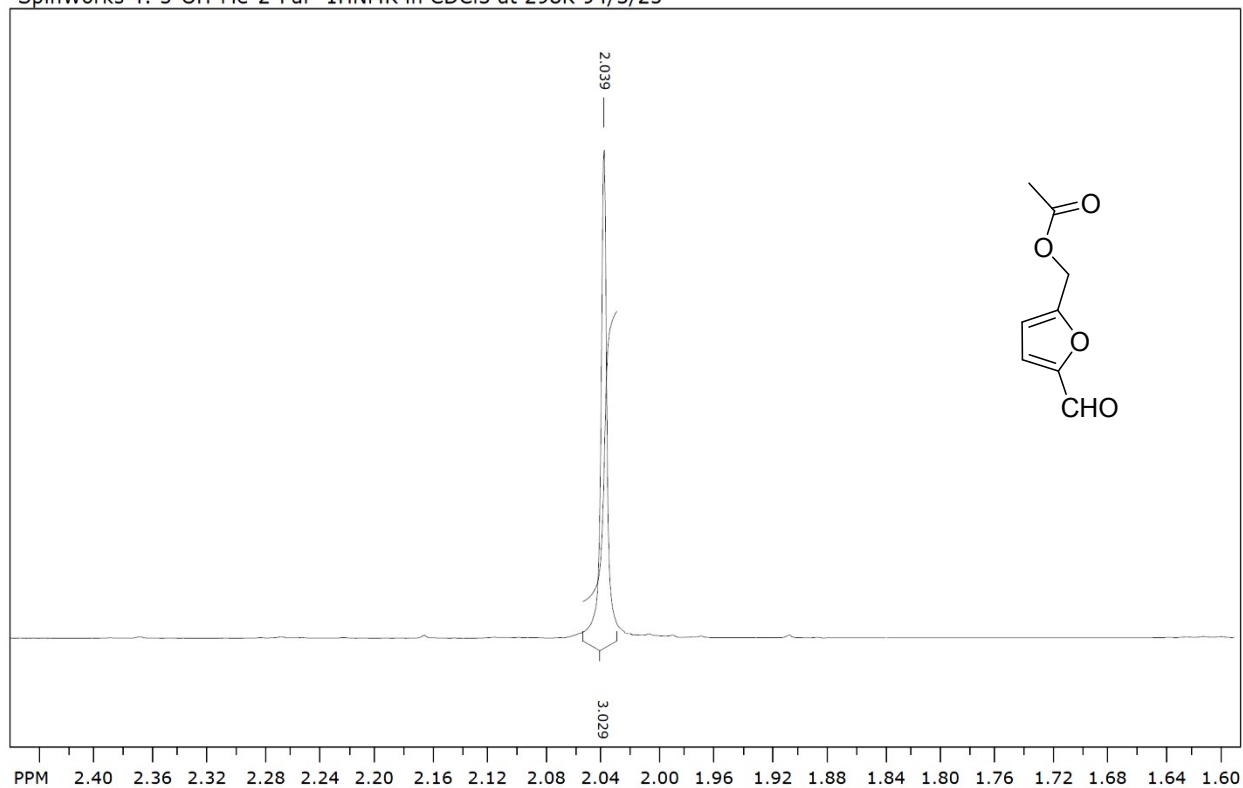

file: ...\\catalysis\\aerobic\\Sheykh\\10\\fid expt: <zg30>  
transmitter freq.: 500.133089 MHz  
time domain size: 32768 points  
width: 10000.00 Hz = 19.9947 ppm = 0.305176 Hz/pt  
number of scans: 16

freq. of 0 ppm: 500.130044 MHz  
processed size: 32768 complex points  
LB: 0.300 GF: 0.0000  
Hz/cm: 17.473 ppm/cm: 0.03494

SpinWorks 4: Me-C<sub>6</sub>H<sub>4</sub>-CH<sub>2</sub>-CH<sub>2</sub>-OH 1HNMR in CDCl<sub>3</sub> at 298K 94/3/25

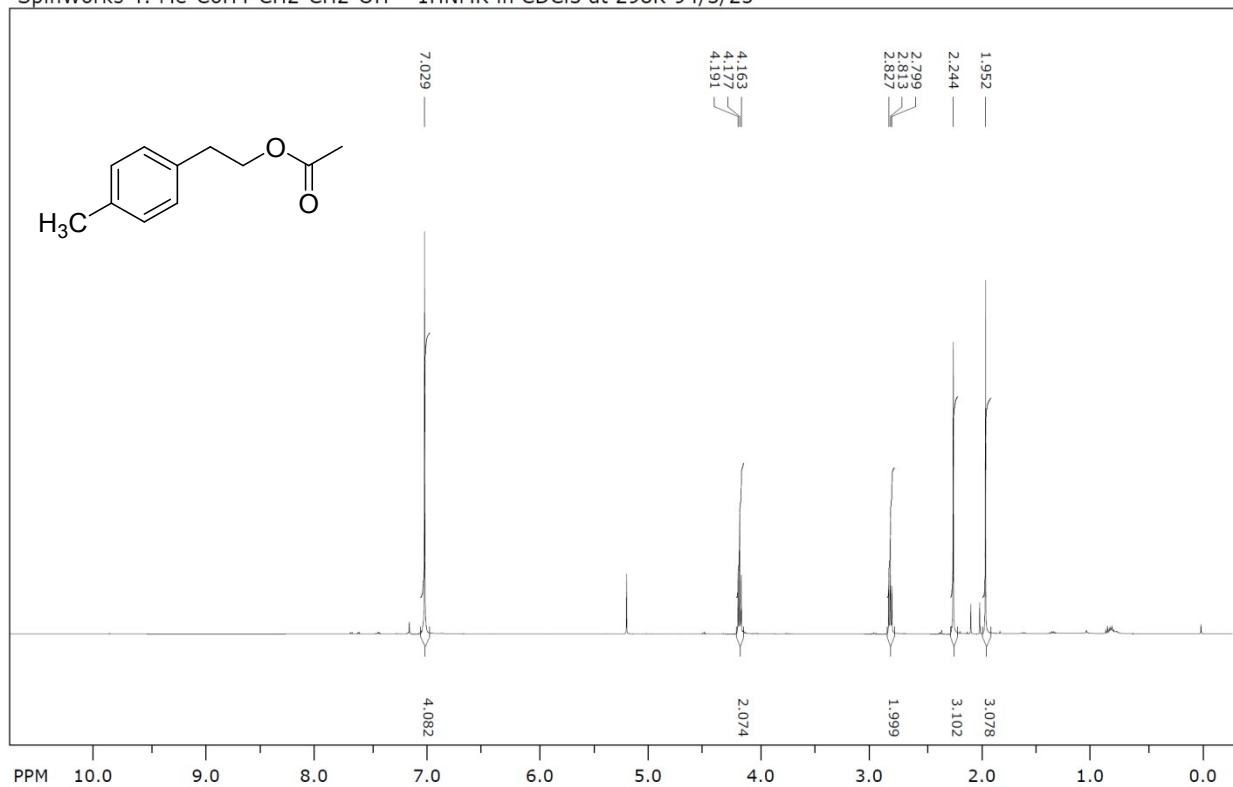

file: ...:\catalysis\ aerobic\Sheykhan\9\fid expt: <zg30>  
transmitter freq.: 500.133089 MHz  
time domain size: 32768 points  
width: 10000.00 Hz = 19.9947 ppm = 0.305176 Hz/pt  
number of scans: 16

freq. of 0 ppm: 500.130069 MHz  
processed size: 32768 complex points  
LB: 0.300 GF: 0.0000  
Hz/cm: 221.509 ppm/cm: 0.44290

SpinWorks 4: Me-C<sub>6</sub>H<sub>4</sub>-CH<sub>2</sub>-CH<sub>2</sub>-OH 1HNMR in CDCl<sub>3</sub> at 298K 94/3/25

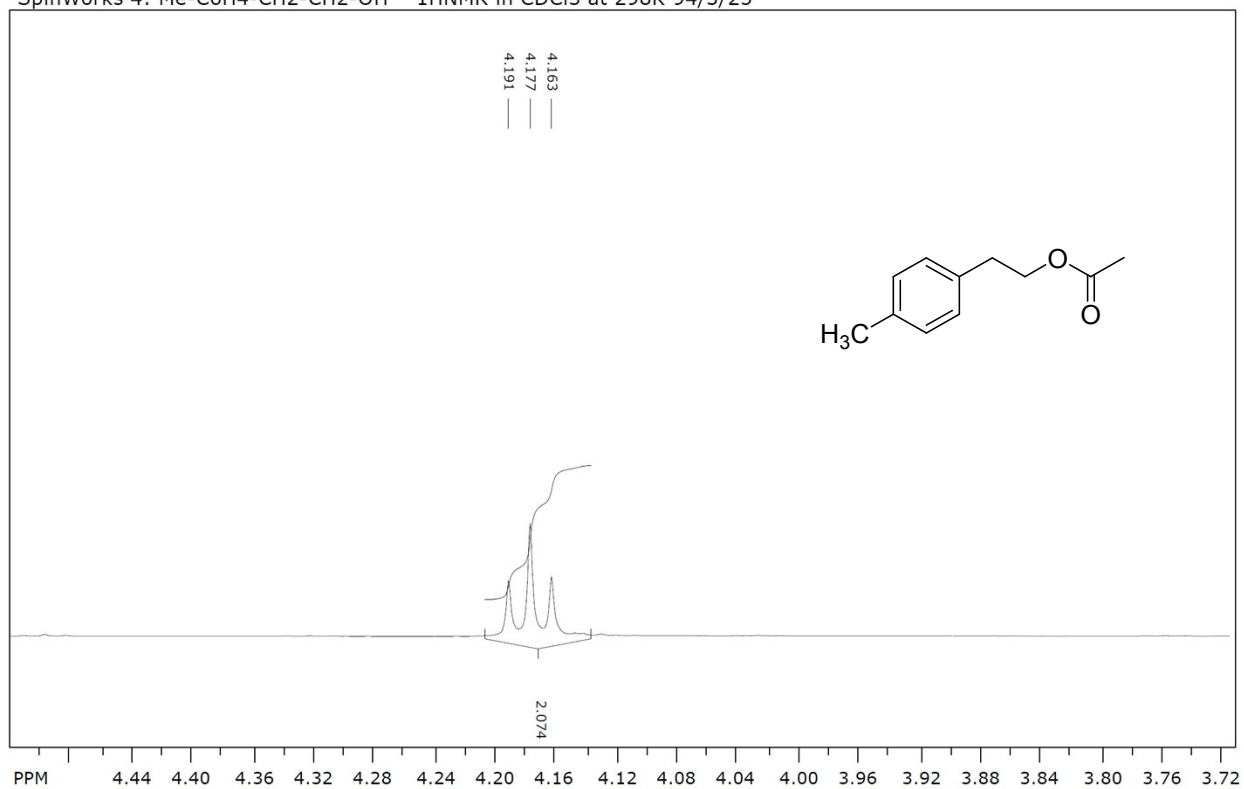

file: ....\catalysis\ aerobic\Sheykhan\9\fid expt: <zg30>  
transmitter freq.: 500.133089 MHz  
time domain size: 32768 points  
width: 10000.00 Hz = 19.9947 ppm = 0.305176 Hz/pt  
number of scans: 16

freq. of 0 ppm: 500.130069 MHz  
processed size: 32768 complex points  
LB: 0.300 GF: 0.0000  
Hz/cm: 16.178 ppm/cm: 0.03235

SpinWorks 4: Me-C6H4-CH2-CH2-OH 1HNMR in CDCl3 at 298K 94/3/25

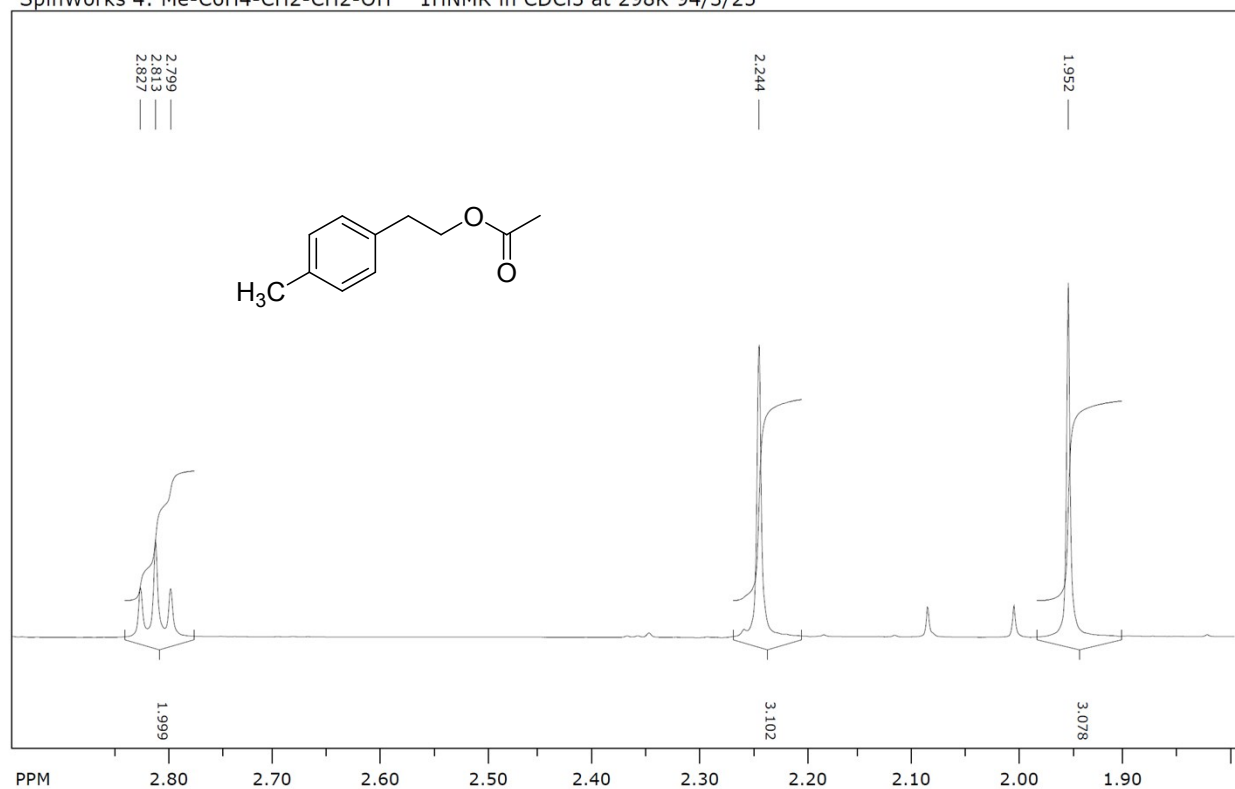

file: ....\catalysis\ aerobic\Sheykhan\9\fid expt: <zg30>  
transmitter freq.: 500.133089 MHz  
time domain size: 32768 points  
width: 10000.00 Hz = 19.9947 ppm = 0.305176 Hz/pt  
number of scans: 16

freq. of 0 ppm: 500.130069 MHz  
processed size: 32768 complex points  
LB: 0.300 GF: 0.0000  
Hz/cm: 23.111 ppm/cm: 0.04621

SpinWorks 4: Ph-C-C-C-OH 1HNMR in CDCl3 at 298K 94/3/25

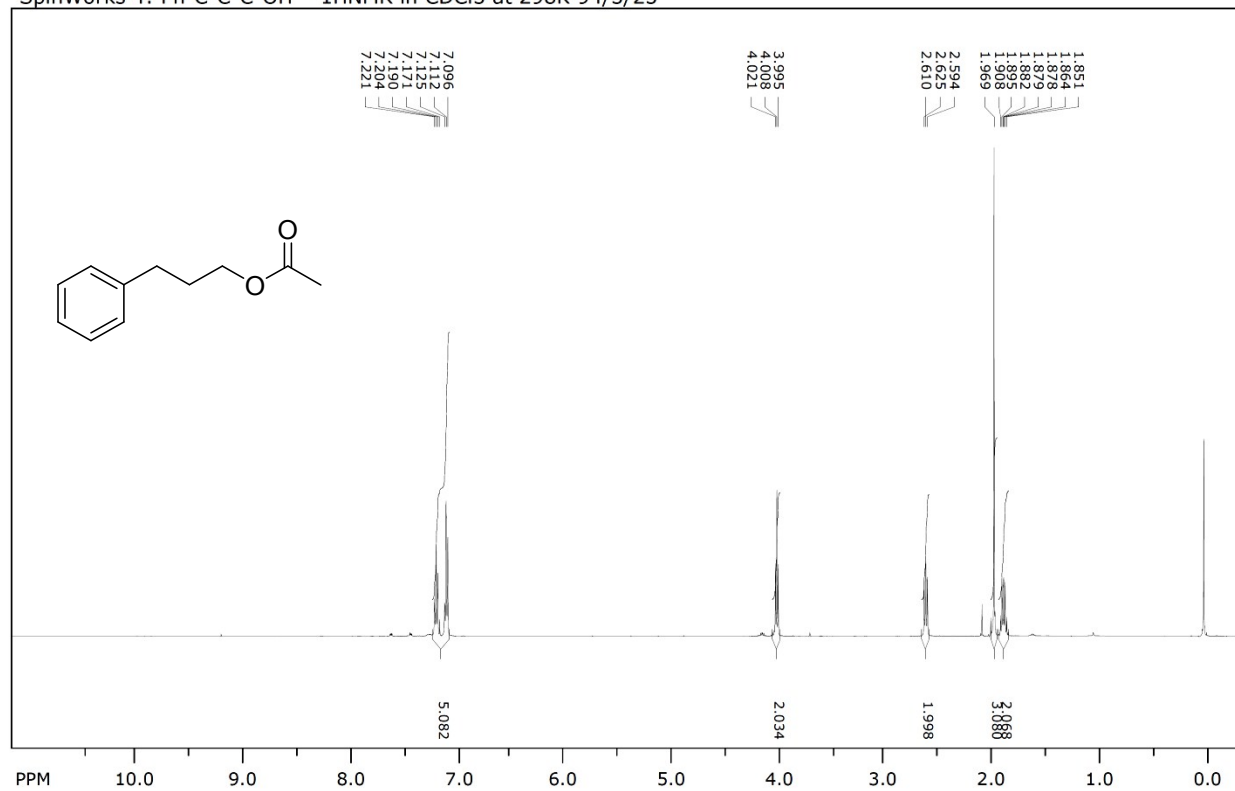

file: ...catalysis/aerobic/Sheykhani\14\fid expt: <zg30>  
 transmitter freq.: 500.133089 MHz  
 time domain size: 32768 points  
 width: 10000.00 Hz = 19.9947 ppm = 0.305176 Hz/pt  
 number of scans: 16

freq. of 0 ppm: 500.130067 MHz  
 processed size: 32768 complex points  
 LB: 0.300 GF: 0.0000  
 Hz/cm: 230.177 ppm/cm: 0.46023

SpinWorks 4: Ph-C-C-C-OH 1HNMR in CDCl3 at 298K 94/3/25

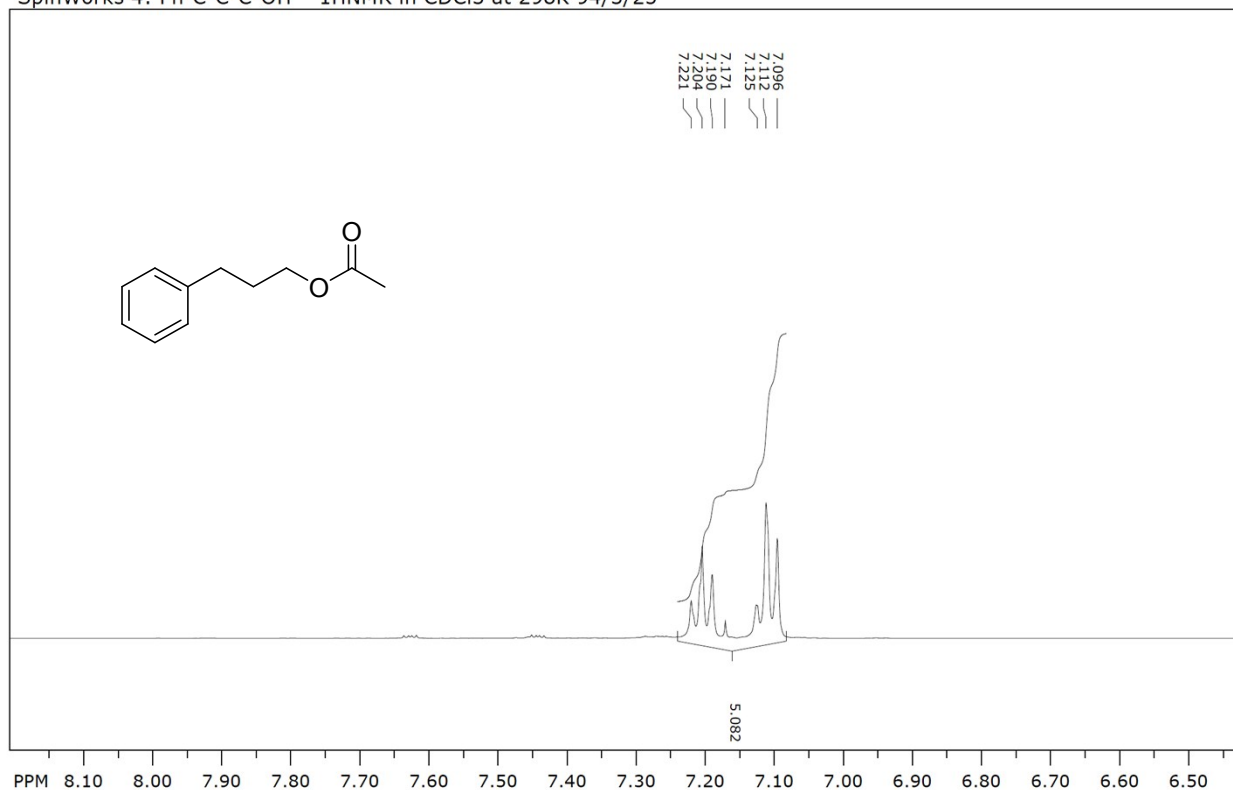

file: ...catalysis\ aerobic\Sheykhan\14\fid expt: <zg30>  
transmitter freq.: 500.133089 MHz  
time domain size: 32768 points  
width: 10000.00 Hz = 19.9947 ppm = 0.305176 Hz/pt  
number of scans: 16

freq. of 0 ppm: 500.130067 MHz  
processed size: 32768 complex points  
LB: 0.300 GF: 0.0000  
Hz/cm: 35.653 ppm/cm: 0.07129

SpinWorks 4: Ph-C-C-C-OH 1HNMR in CDCl3 at 298K 94/3/25

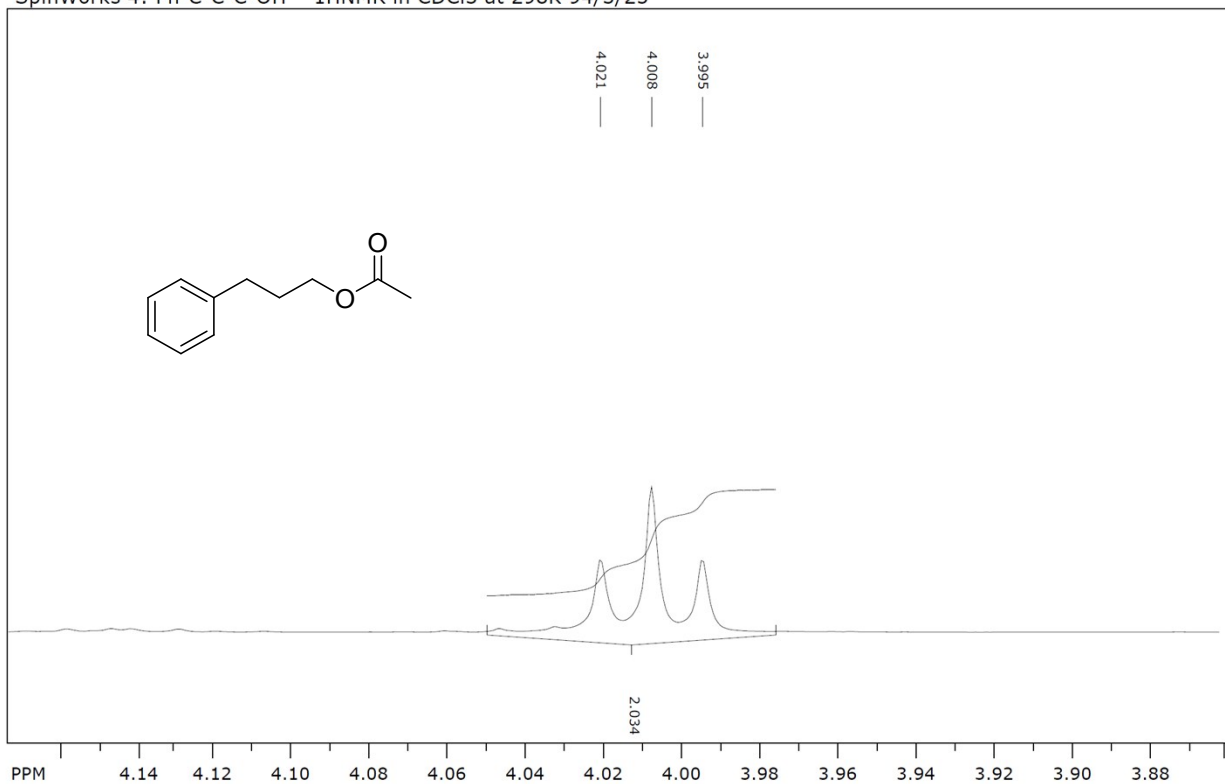

file: ...catalysis\ aerobic\Sheykhan\14\fid exp: <zg30>  
 transmitter freq.: 500.133089 MHz  
 time domain size: 32768 points  
 width: 10000.00 Hz = 19.9947 ppm = 0.305176 Hz/pt  
 number of scans: 16

freq. of 0 ppm: 500.130067 MHz  
 processed size: 32768 complex points  
 LB: 0.300 GF: 0.0000  
 Hz/cm: 6.281 ppm/cm: 0.01256

SpinWorks 4: Ph-C-C-C-OH 1HNMR in CDCl3 at 298K 94/3/25

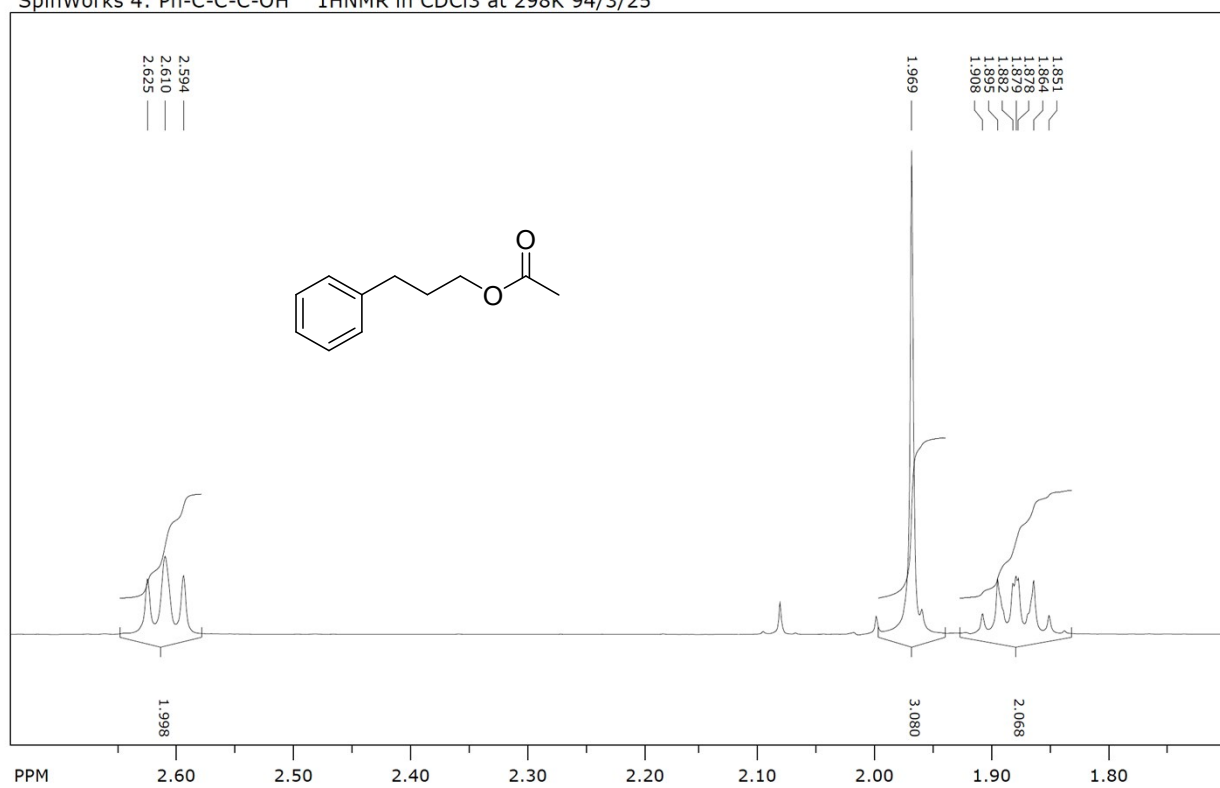

file: ...catalysis\ aerobic\Sheykhan\14\fid exp: <zg30>  
 transmitter freq.: 500.133089 MHz  
 time domain size: 32768 points  
 width: 10000.00 Hz = 19.9947 ppm = 0.305176 Hz/pt  
 number of scans: 16

freq. of 0 ppm: 500.130067 MHz  
 processed size: 32768 complex points  
 LB: 0.300 GF: 0.0000  
 Hz/cm: 20.875 ppm/cm: 0.04174
